*Gibson et al. ER46 in human endometrium*

1 **Profiling the expression and function of ER46 in human endometrial tissues and uterine**

2 **NK cells**

3 Douglas A Gibson<sup>1\*</sup>, Arantza Esnal-Zufiaurre<sup>1</sup>, Cristina Bajo-Santos<sup>2</sup>, Frances Collins<sup>1</sup>, Hilary  
4 OD Critchley<sup>3</sup> and Philippa TK Saunders<sup>1</sup>.

5 <sup>1</sup>Centre for Inflammation Research, University of Edinburgh

6 <sup>2</sup>Latvian Biomedical Research and Study Centre

7 <sup>3</sup>MRC Centre for Reproductive Health, University of Edinburgh

8

9 Running title: ER46 in human endometrium

10

11 \*Corresponding Author

12 Dr Douglas A. Gibson,

13 The University of Edinburgh/ Centre for Inflammation Research

14 The Queen's Medical Research Institute

15 Edinburgh BioQuarter

16 47 Little France Crescent

17 Edinburgh

18 EH16 4TJ

19 Tel: (+44)01312426685

20 E-mail: [d.a.gibson@ed.ac.uk](mailto:d.a.gibson@ed.ac.uk)

21

22 Key words: Endometrium, ER46, ER $\alpha$ , splice variant, uNK cell, decidua

23

*Gibson et al. ER46 in human endometrium*

24 **Abstract**

25 **Study question:** Does the oestrogen receptor isoform, ER46, contribute to regulation of  
26 endometrial function?

27 **Summary answer:** ER46 is expressed in endometrial tissues during the proliferative and  
28 secretory phases and is the predominant ER $\alpha$  isoform in first trimester decidua. ER46 is  
29 abundantly expressed in uterine NK (uNK) cells and localised to the cell membrane. Activation  
30 of ER46 regulates the function of human uNK cells by increasing cell motility.

31 **What is known already:** Oestrogens acting via their cognate receptors are essential  
32 regulators of endometrial function and play key roles in establishment of pregnancy. ER46 is  
33 a 46kDa truncated isoform of full length ER $\alpha$  (ER66, encoded by *ESR1*) that contains both  
34 ligand and DNA binding domains. Expression of ER46 in human endometrium has not been  
35 investigated previously. ER46 is located at the cell membrane of peripheral blood leukocytes  
36 and mediates rapid responses to oestrogens. UNK cells are a phenotypically distinct  
37 (CD56<sup>bright</sup>CD16<sup>-</sup>) population of tissue-resident immune cells that regulate vascular  
38 remodelling within the endometrium and decidua. We have shown that oestrogens stimulate  
39 rapid increases in uNK cell motility. Previous characterisation of uNK cells suggests they are  
40 ER66-negative but expression of ER46 has not been characterised. We hypothesise that uNK  
41 cells express ER46 and that rapid responses to oestrogens are mediated via this receptor.

42 **Study design, size, duration:** This laboratory-based study used primary human endometrial  
43 (n=24) and decidual tissue biopsies (n=30) as well as uNK cells which were freshly isolated  
44 from first trimester human decidua (n=18).

45 **Participants/materials, setting, methods:** Primary human endometrial and first trimester  
46 decidual tissue biopsies were collected using methods approved by the local institutional  
47 ethics committee (LREC/05/51104/12 and LREC/10/51402/59). The expression of oestrogen  
48 receptors (ER66, ER46 and ER $\beta$ ) was assessed by qPCR, western blot and  
49 immunohistochemistry. Uterine Natural Killer (uNK) cells were isolated from first trimester

*Gibson et al. ER46 in human endometrium*

50 human decidua by magnetic bead sorting. Cell motility of uNK cells was measured by live cell  
51 imaging: cells were treated with oestradiol (E2)-BSA (10nM equivalent), the ER $\beta$ -selective  
52 agonist 2,3-bis (4-hydroxyphenyl)-propionitrile (DPN; 10nM) or vehicle control (DMSO).

53 **Main results and the role of chance:** ER46 was detected in proliferative and secretory phase  
54 tissues and was the predominant ER $\alpha$  isoform in first trimester decidua samples.  
55 Immunohistochemistry revealed ER46 was co-localised with ER66 in cell nuclei during the  
56 proliferative phase but detected in both the cytoplasm and cell membrane of stromal cells in  
57 the secretory phase and in decidua. Triple immunofluorescence staining of decidua tissues  
58 identified expression of ER46 in the cell membrane of CD56-positive uNK cells which were  
59 otherwise ER66-negative. Profiling of isolated uNK cells confirmed expression ER46 and  
60 localised ER46 protein to the cell membrane. Functional analysis of isolated uNK cells using  
61 live cell imaging demonstrated that activation of ER46 with E2-BSA significantly increased  
62 uNK cell motility.

63 **Limitations, reasons for caution:** Expression patterns in endometrial tissue was only  
64 determined using samples from proliferative and secretory phases. Assessment of first  
65 trimester decidua samples was from a range of gestational ages which may have precluded  
66 insights into gestation specific changes in these tissues. Our results are based on *in vitro*  
67 responses of primary human cells and we cannot be certain that similar mechanisms occur *in*  
68 *situ*.

69 **Wider implications of the findings:** E2 is an essential regulator of reproductive competence.  
70 This study provides the first evidence for expression of ER46 in human endometrium and  
71 decidua of early pregnancy. We describe a mechanism for regulating the function of human  
72 uNK cells via expression of ER46 and demonstrate that selective targeting with E2-BSA  
73 regulates uNK cell motility. These novel findings identify a role for ER46 in human  
74 endometrium and provide unique insight into the importance of membrane-initiated signalling  
75 in modulating the impact of E2 on uNK cell function in women.

*Gibson et al. ER46 in human endometrium*

76 **Study funding/competing interest(s):** These studies were supported by MRC Programme  
77 Grants G1100356/1 and MR/N024524/1 to PTKS. HODC was supported by MRC grant  
78 G1002033.

79

*Gibson et al. ER46 in human endometrium*

80 **Introduction**

81 Oestrogens are essential for reproductive function and fertility. They classically mediate their  
82 functions by binding to cognate receptors, ER $\alpha$  and ER $\beta$ , encoded by the genes *ESR1* and  
83 *ESR2* respectively. Oestrogens act via systemic endocrine signals and via local intracrine  
84 action to regulate key functional processes within the endometrium including proliferation,  
85 angiogenesis and inflammation (Gibson, et al., 2012) that prime the endometrium for  
86 establishment and maintenance of pregnancy (Gibson, et al., 2013, Gibson, et al., 2018).  
87 Oestrogen action is controlled by ligand availability but also via expression and localisation of  
88 ER isoforms which are altered in a cell and tissue context-dependent manner. We have  
89 previously used qPCR and immunohistochemistry to document stage and cell-specific  
90 expression of ER $\alpha$  and ER $\beta$ , as well as ER $\beta$  splice variant isoforms in human endometrium  
91 and decidua of early pregnancy (reviewed in (Gibson, et al., 2012)). Endometrial ER $\alpha$   
92 expression is greatest in the proliferative phase with decreased expression in the secretory  
93 phase and a further reduction in first trimester decidual tissue compared to non-pregnant  
94 endometrial tissues (Critchley, et al., 2002, Milne, et al., 2005). In those studies we used a  
95 mouse monoclonal antibody directed against recombinant human ER $\alpha$ ; the epitope for this  
96 antibody was not defined but it recognised a protein of 66KDa (consistent with full length wild  
97 type ER $\alpha$ ) in breast cancer cell homogenates detected by western blot (Chantalat, et al., 2016)  
98 and detected ER $\alpha$  in both stromal and epithelial cells by immunohistochemistry ((Bombail, et  
99 al., 2008) see figures 4 and 5). In these studies, immunostaining for ER $\alpha$  detected a protein  
100 that was exclusively nuclear, consistent with the established functional role of this receptor  
101 protein as a ligand-activated transcription factor.

102 The human *ESR1* gene exhibits differential promoter usage and alternative splicing which give  
103 rise to splice variant isoforms of the receptor protein. ER46 was the first identified splice variant  
104 of human *ESR1* (initially designated hER $\alpha$ -46; (Flouriot, et al., 2002)). The ER46 variant is a  
105 46kDa protein which lacks the N-terminal 173 amino acids of the full length ER $\alpha$  protein  
106 (66KDa, hereafter referred to as ER66) and arises from splicing of exon 1E to exon 2 via the

*Gibson et al. ER46 in human endometrium*

107 E and F promoters (Flouriou, et al., 2002). ER46 contains both ligand binding and DNA binding  
108 domains and has been reported to bind oestradiol (E2) and to induce expression of oestrogen  
109 response element (ERE)-driven reporter genes (Flouriou, et al., 2002). ER46 and ER66 share  
110 identical sequence homology except that the N-terminal 173 amino acids of ER66 are absent  
111 in ER46. As all amino acids in ER46 are also present in ER66, there is no specific antibody  
112 that can uniquely identify ER46. It is therefore challenging to assess cell-specific patterns of  
113 native ER46 protein expression and this has limited our understanding of its functional  
114 significance.

115 ER46 and ER66 proteins can be resolved by size using western blotting techniques in  
116 combination with ER $\alpha$ -specific antibodies that recognise epitopes in the N-terminus (ER66  
117 alone) or C-terminus (ER66 and/or ER46) of the proteins. Using this approach native  
118 expression of ER46 has been reported in human endothelial cell lines (Li, et al., 2003) and in  
119 human peripheral blood leukocytes (Pierdominici, et al., 2010). Detailed microscopy studies  
120 by Kim et al, using fluorescent tagged fusion protein revealed that ER46 can be detected  
121 localised to the plasma membrane in endothelial cells (Kim, et al., 2011). These studies have  
122 also demonstrated that membrane-associated ER46 can mediate rapid responses to  
123 oestrogens suggesting this receptor isoform may play a key role in 'non-genomic' or  
124 'membrane-initiated' oestrogen receptor signalling (Kim, et al., 2014).

125 Uterine natural killer (uNK) cells are an abundant leukocyte population present in the  
126 endometrium during the late secretory phase and in the decidua of pregnancy and are  
127 characterised by high expression of the glycoprotein neural cell adhesion molecule (CD56)  
128 (Bulmer, et al., 1991, Koopman, et al., 2003). They are abundant in perivascular and luminal  
129 regions of the endometrium and play key roles in regulating vascular remodelling in early  
130 pregnancy and during placentation (Bulmer, et al., 2012, Robson, et al., 2012). Dysregulation  
131 of uNK cell function has been implicated in disorders of pregnancy including pre-eclampsia,  
132 foetal growth restriction, and recurrent pregnancy loss (Bulmer, et al., 2019, Gaynor, et al.,

*Gibson et al. ER46 in human endometrium*

133 2017). However, the factors that regulate uNK cell function in both normal and pathological  
134 pregnancy remain poorly understood.

135 We have previously shown that isolated human uNK cells are exquisitely sensitive to  
136 oestrogens and can be stimulated to increase cell motility (chemokinesis and migration) in  
137 response to E2 (Gibson, et al., 2015). Notably, changes in uNK cell motility in response to E2  
138 are rapid, initiated within minutes, and detected within 1 hour of treatment; consistent with a  
139 possible non-genomic signalling response (Gibson, et al., 2015). We demonstrated that uNK  
140 cell response to E2 was abrogated in the presence of the ER antagonist ICI 182,780  
141 (Fulvestrant) consistent with an ER-dependent mechanism (Gibson, et al., 2015). We have  
142 previously characterised human uNK cells as ER $\alpha$  (ER66)-negative and ER $\beta$ -positive by  
143 immunohistochemistry and qPCR (Gibson, et al., 2015, Henderson, et al., 2003) but in those  
144 studies we did not consider expression of ER46 or its potential role in rapid responses to  
145 oestrogens.

146 In the current study we used qPCR, western blot and multiplex immunohistochemistry to  
147 assess expression of ER46, ER66 and ER $\beta$  in endometrial tissues and isolated uNK cells. We  
148 sought to identify cell populations within the endometrium that express ER46, define cellular  
149 localisation of receptor proteins and to investigate a potential functional role for ER46 in  
150 mediating oestrogen responses in uNK cells.

151 **Material and Methods**

152 *Human Tissue Samples*

153 Human endometrial tissues were obtained from women undergoing surgery for benign  
154 gynaecological conditions (n=24) and human decidua samples from women undergoing  
155 surgical termination of pregnancy, mean gestation of 10 weeks, (n=30). Local ethical  
156 committee approval was granted and written informed patient consent was obtained prior to  
157 tissue collection by a dedicated research nurse (Ethical approval held by HODC;  
158 LREC/05/51104/12 and LREC/10/51402/59). Tissue samples were fixed in 4% neutral

*Gibson et al. ER46 in human endometrium*

159 buffered formalin or RNA Save (Geneflow, Staffordshire, UK). Stage of the menstrual cycle  
160 was determined histologically by an experienced gynaecological pathologist and by  
161 measurement of serum E2 and progesterone levels as previously detailed (Bombail, et al.,  
162 2008). Primary human uNK cells were isolated from fresh human first trimester decidua as  
163 described previously (Gibson, et al., 2015). Briefly, decidual tissues (n=18) were minced,  
164 digested in collagenase/DNAse and passed through 70 and 40 µm cell strainers. The cell  
165 suspension was overlaid on Histopaque 1077 (Sigma-Aldrich, USA) to separate leukocytes.  
166 UNK cells isolated by MACS magnetic bead separation using CD3 depletion and CD56  
167 selection (Miltenyi Biotech, Germany).

168 Ishikawa (human endometrial adenocarcinoma) cells (ECACC\_99040201) which express  
169 ER66 were used as a positive control for western blotting and qPCR: cells were cultured  
170 according to established protocols (Collins, et al., 2009).

171 *RNA Extraction, cDNA synthesis and Quantitative real time PCR*

172 Total RNA was extracted from cell pellets or 20mg of tissue using Tri-Reagent and chloroform  
173 and homogenisation using a tissue lyser for 2 minutes at 20Hz (Qiagen). RNA was extracted  
174 using RNeasy Mini kit (Qiagen, UK) according to manufacturer's instructions. RNA quantity  
175 and purity was confirmed by Nanodrop ND-1000 spectrophotometry (Thermo Scientific) and  
176 was standardised to 100ng/µl for all samples. CDNA was synthesised using SuperScript VILO  
177 cDNA Synthesis kit (Invitrogen).

178 Quantitative real time PCR (qPCR) was performed with primer sets (Supplemental Table 1)  
179 designed using Roche Universal Probe Library Assay Design Center (Roche Diagnostics, UK)  
180 in conjunction with corresponding FAM-labelled probes. Briefly, a reaction mix was prepared  
181 containing 1x Express Supermix, ribosomal 18S, 200nM of forward/reverse primer and 100nM  
182 probe. Samples were assayed in duplicate, using 18S as internal control reference gene on a  
183 7900HT Fast Real Time PCR machine (Applied Biosystems). Amplification was performed at  
184 95°C for 10 minutes then 40 cycles of 95°C for 15 seconds and 60°C for 1 minute. Target gene  
185 expression was assessed using the  $2^{-\Delta\Delta Ct}$  method where the mean value of the proliferative



*Gibson et al. ER46 in human endometrium*

186 samples (tissues) or Ishikawa cell homogenate (cell samples) was used for relative  
187 quantification.

188 *Protein Extraction*

189 Total protein from 30mg of frozen tissue or cell pellets was extracted by homogenising in lysis  
190 buffer [1% Triton X-100, 167mM NaCl, 5mM EDTA (pH8.5), 50mM Tris (pH 7.5) 2µg/ml  
191 Aprotinin and 1x Halt protease inhibitor cocktail (Thermo Scientific)] using a Tissue Lyser for  
192 2 minutes at 20Hz, followed by centrifugation at 13,000rpm (Eppendorf 5414R) for 10 minutes  
193 at 4°C. Ishikawa cell nuclear and cytoplasmic protein fractions were extracted using Nuclear  
194 Extraction Kit (Active Motif, Belgium) according to manufacturer's instructions. Protein  
195 quantification was performed using DC protein Assay from Bio-Rad and read at 690nm on  
196 mass spectrophotometer (ThermoFisher, US).

197 *Western blot*

198 Western blot was performed to identify ERα proteins corresponding to full length (66kDa) or  
199 truncated ERα (46kDa). Proteins were separated on NuPage Novex 4–12% Bis-Tris  
200 polyacrylamide gels (Life Technologies Inc.) under reducing conditions with NuPage MOPS  
201 SDS running buffer then transferred onto Immobilon FL transfer membrane (EMD Millipore)  
202 using a semidry blotter for 90 minutes at 14V. Membranes were incubated overnight at 4°C  
203 with primary antibodies: mouse anti-ERα 6F11 (1:300); mouse anti-ERα F-10 (1:1000); rabbit  
204 anti-ERβ (1:200); and loading controls were mouse anti-β-Tubulin (1:1000); mouse anti-β  
205 Actin (1:2000); rabbit anti-β Actin (1:500) respectively (Supplemental Table 2). Membranes  
206 were washed in PBS containing 0.1% Tween-20, incubated with appropriate species-specific  
207 fluorescent-conjugated secondary antibodies (Supplemental Table 3) and visualised using  
208 Licor Odyssey infrared imaging system (Licor).

209 *Immunohistochemistry*

210 Tissues were sectioned and subjected to antigen retrieval in 0.01M citrate pH6 and  
211 immunohistochemistry performed according to standard methods (Critchley, et al., 2001).

*Gibson et al. ER46 in human endometrium*

212 Sections were incubated overnight with primary antibodies; ER $\alpha$  (F-10), ER $\alpha$  (6F11) or CD56  
213 (as detailed in Supplemental Table 2) at 4°C followed by incubation with peroxidase  
214 conjugated secondary antibody for 1 hour (Supplemental Table 3). Antigen detection was  
215 performed using Tyramide signal amplification (Perkin Elmer-TSA-Plus Fluorescein)  
216 according to manufacturer's instruction. Negative controls, omitting the primary antibody, were  
217 included in each experiment.

218 For multiplex immunofluorescence experiments, an elution step was performed prior to  
219 addition of the next primary antibody by microwaving sections in 0.01M citrate buffer (pH 6.0)  
220 for 150 seconds and left to cool for 20min. This was followed by serum block and overnight  
221 incubation at 4°C with primary antibodies. Up to three primary antibodies, ER $\alpha$  (F-10), ER $\alpha$   
222 (6F11) or CD56, were used and combined with PerkinElmer-TSA-Plus-Fluorescein (Green),  
223 PerkinElmer-TSA-Plus-Cy3 (Red) and PerkinElmer-TSA-Plus-Cy5 (Blue) respectively. Slides  
224 were counterstained with DAPI and mounted with Permafluor (Thermo Scientific) prior to  
225 imaging.

226 *Immunocytochemistry*

227 Isolated uNK cells were cultured in coated BD Falcon Chamber slides (BD Bioscience, UK)  
228 and washed twice with PBS at room temperature. Cells were fixed in ice cold methanol for 20  
229 minutes, washed, and permeabilised in a solution containing 0.2% IGEPAL (Sigma Aldrich,  
230 USA), 1% BSA and 10% NGS diluted in PBS for 20 minutes at room temperature. Endogenous  
231 peroxidase was blocked by immersing slides in 0.15% H<sub>2</sub>O<sub>2</sub> in methanol for 30 minutes and  
232 non-specific binding was blocked by incubating cells in NGS/PBS/BSA for 30 minutes. Cells  
233 were incubated with an anti-ER $\alpha$  antibody (F-10) overnight followed by Cy3 Tyramide signal  
234 amplification (PerkinElmer-TSA-Plus-Cy3) according to manufacturer's instructions. Slides  
235 were counterstained with DAPI and were mounted in Permafluor prior to imaging.

236 *Imaging*

*Gibson et al. ER46 in human endometrium*

237 Fluorescent images were acquired with a Zeiss LSM 710 Confocal microscope and processed  
238 with ZEN 2009 Software (Zeiss).

239 *Live Cell Imaging*

240 The chemokinesis of uNK cells was assessed as described previously (Gibson, et al., 2015).  
241 Isolated uNK cells were suspended in a collagen matrix in Ibidi  $\mu$ -Slide Chemotaxis3D  
242 chamber slides (Ibidi, 80326, supplied by Thistle Scientific Ltd, Uddingston, UK). Chamber  
243 slides were set up containing serum-free phenol red-free RPMI 1640 media and treatment.  
244 The response to the membrane impermeable ligand E2-BSA (10nM equivalent), the ER $\beta$ -  
245 selective agonist 2,3-bis (4-hydroxyphenyl)-propionitrile (DPN; 10nM) or vehicle control  
246 (DMSO) was measured using time lapse microscopy. Cells were imaged every 2 minutes for  
247 2 hours using Axiovert 200 Inverted Fluorescent Microscope (Zeiss). Data were analysed  
248 using ImageJ (manual cell tracking plug-in) and chemotaxis and migration tool software (Ibidi).

249 *Statistics*

250 Statistical analysis was performed using GraphPad Prism. Kruskal-Wallis test with Dunn's  
251 multiple comparison test was used to determine significance between treatments. Where  
252 data were analysed as fold change, significance was tested using one-sample *t* test with  
253 hypothetical mean of 1. Criterion for significance was  $p < 0.05$ . All data are presented as  
254 mean  $\pm$  SEM.

255 **Results**

256 *Profiling human endometrial tissues reveals distinct patterns of ER isoform expression*

257 Due to the overlapping sequence homology between mRNAs encoding full length ER $\alpha$  (ER66)  
258 and the truncated splice variant isoform ER46 it is impossible to design oligonucleotide primers  
259 that can uniquely distinguish between the two isoforms. In this study we designed primer pairs  
260 (see Supplementary Table 1) directed against sequences in the N or C-terminal of the receptor  
261 and used these to detect mRNAs for either ER66 alone (N-terminal primers) or ER66 and/or  
262 ER46 (C-terminal primers). Consistent with data from our previous studies (Critchley, et al.,

*Gibson et al. ER46 in human endometrium*

263 2002, Milne, et al., 2005) and those of others (Binder, et al., 2015) mRNAs encoded by *ESR1*  
264 assessed using N-terminal primers were present in endometrial tissue homogenates from  
265 proliferative and secretory phase endometrium (Figure 1A) and significantly decreased in  
266 decidual tissue homogenates ( $p < 0.01$ ). In contrast, mRNA expression of *ESR1* assessed  
267 using C-terminal primers was detected in all samples and was most abundant in secretory  
268 phase endometrium (Figure 1B). Consistent with our previous findings (Critchley, et al., 2002),  
269 mRNAs encoded by *ESR2* (detected using primers directed against the wild type isoform,  
270 ER $\beta$ 1) were more abundant in secretory phase endometrium and decidua than samples from  
271 proliferative phase (Figure 1C).

272 We next assessed protein expression of ER46 and ER66 isoforms by performing western  
273 blotting using antibodies directed against either the whole receptor (clone 6F11) or an epitope  
274 in the C-terminal domain (clone F-10) of ER $\alpha$ . Densitometry measurements confirmed  
275 variation in the abundance of ER proteins (Figure 2A and B); endometrial tissues expressed  
276 all three proteins whereas in decidua ER66 was not detected and expression of ER46 ( $p < 0.05$ )  
277 and ER $\beta$ 1 ( $p < 0.001$ ) was significantly greater than ER66. A single protein band (~66kDa) was  
278 detected in endometrial tissue homogenates using the ER $\alpha$  6F11 antibody: decidual tissue  
279 homogenates had no detectable protein at this size (Figure 2C and D). Using the C-terminal-  
280 specific ER $\alpha$  F-10 antibody, proteins corresponding to both 46kDa and 66kDa were detected  
281 in endometrium (Figure 2C) but only a 46kDa protein was detectable in decidua (Figure 2D).  
282 A single 59kDa band corresponding to full length ER $\beta$ 1 (Critchley, et al., 2002) was detected  
283 in all samples (Figure 2C and D).

284 *Immunostaining of ER isoforms in endometrial tissues*

285 Dual immunohistochemistry was performed in endometrial tissues to assess the pattern of  
286 expression of proteins recognised by the 6F11 and F-10 ER $\alpha$  antibodies. Expression of ER46  
287 was inferred from the presence of staining using the C-terminal ER $\alpha$  F-10 antibody and  
288 absence of staining with the ER $\alpha$  6F11 antibody. In proliferative phase endometrium (Figure  
289 3), ER $\alpha$  was detected with both the ER $\alpha$  6F11 antibody (green) and C-terminal ER $\alpha$  F-10

### *Gibson et al. ER46 in human endometrium*

290 antibody (red). Consistent with our previous findings (Bombail, et al., 2008, Milne, et al., 2005),  
291 expression of ER66 was detected in nuclei of both stromal and epithelial cells (yellow arrows).  
292 In contrast, a divergent pattern of expression was observed in secretory phase tissue (Figure  
293 3; 'secretory'). ER66 detected using the ER $\alpha$  6F11 antibody (green) was localised exclusively  
294 to cell nuclei and detected in all epithelial cells and some stromal cells. Positive staining using  
295 the C-terminal ER $\alpha$  F-10 antibody (ER46/66, red) was detected in the nuclei of epithelial and  
296 stromal cells and overlapped with ER $\alpha$  6F11 antibody (yellow arrow). However, C-terminal  
297 ER $\alpha$  F-10 antibody (red) also localised to extra-nuclear sites and was detected in the  
298 cytoplasm of epithelial and stromal cells (white arrowhead) as well as the membrane of some  
299 cells (white arrows). Notably, when protein was localised to the membrane no staining was  
300 detectable in the nucleus using either antibody (white arrows). This pattern of expression was  
301 most obvious in first trimester decidual tissues which express lower concentrations of ER66  
302 (Figure 1A and Figure 2B). Cytoplasmic expression of ER $\alpha$  was detected using the C-terminal  
303 ER $\alpha$  F-10 antibody (red) in decidualised stromal cells (white arrowhead) and membrane  
304 expression was apparent on numerous cells within the stromal compartment (white arrow).

### 305 *Human uNK cells express of ER46 in first trimester decidual tissues*

306 As CD56-positive uterine natural killer (uNK) cells are the most abundant leukocyte in first  
307 trimester decidual tissues, we investigated whether membrane ER $\alpha$  expression was  
308 associated with this cell by performing triple immunohistochemistry using the 6F11 and ER $\alpha$   
309 F-10 antibodies and anti-CD56 (Figure 4). Co-staining of ER $\alpha$  6F11 antibody (green)  
310 confirmed our previous finding that CD56-positive cells (blue) were ER66-negative (Figure 4).  
311 In contrast, ER $\alpha$  was detected on the membranes of uNK cells using the C-terminal ER $\alpha$  F-10  
312 antibody (red): this co-expression is visible as pink staining on the surface of uNK cells (white  
313 arrows; Figure 4).

### 314 *Expression of ER46 in isolated human uNK cells*

315 UNK cells were isolated from decidua by magnetic sorting and expression of ER66, ER46 and  
316 ER $\beta$ 1 was assessed by qPCR, western blot and immunocytochemistry (Figure 5). Consistent

*Gibson et al. ER46 in human endometrium*

317 with our previous studies, mRNAs detected using N-terminal primers (ER66) were significantly  
318 lower in uNK cells than Ishikawa cells ( $p < 0.0001$ ), in contrast, mRNAs detected using C-  
319 terminal-specific primers were significantly higher in uNK cells (Figure 5A;  $p < 0.05$ ). Expression  
320 of ER46 in isolated uNK cells was confirmed by western blot (Figure 5B) and  
321 immunofluorescence with staining localised to the cell membrane (Figure 5C). Consistent with  
322 our previous findings, uNK cells contained mRNAs encoded by *ESR2* as well as protein of  
323 59KDa on western blots corresponding to full length ER $\beta$ 1 protein (Figure 5A and B).

324 *ER46 expression in uNK cells promotes membrane-initiated changes in cell motility*

325 We have previously demonstrated that treatment of isolated uNK cells with E2 results in  
326 increased rates of cell migration (Gibson, et al., 2015). Based on receptor expression profiling  
327 described above, we investigated whether the impact of E2 on uNK cells could be mediated  
328 by ER46 (membrane) or ER $\beta$  (nucleus). Cells were treated with E2 conjugated to BSA (E2-  
329 BSA) which cannot cross the cell membrane and would putatively activate ER46, the ER $\beta$ -  
330 selective agonist DPN or to vehicle control (DMSO). We performed live cell imaging of uNK  
331 cells using time-lapse microscopy and assessed cell motility. E2-BSA significantly increased  
332 uNK cell velocity compared to both DMSO ( $p < 0.0001$ ) and DPN ( $p < 0.001$ ) (Figure 5D). Mean  
333 velocity of DPN-treated cells was slightly greater than DMSO, but this was not statistically  
334 significant. Similarly, E2-BSA significantly increased the accumulated distance of uNK cells  
335 compared to both DMSO ( $p < 0.0001$ ) and DPN ( $p < 0.001$ ) (Figure 5E). DPN did not have an  
336 independent effect on uNK cell accumulated distance within 2 hours of incubation.

337

*Gibson et al. ER46 in human endometrium*

338 **Discussion**

339 Oestrogens are essential regulators of endometrial function and fertility. Expression of the ER  
340 splice variant ER46 has been demonstrated in peripheral blood leukocytes and isolated  
341 endothelial cells. In the current study, we have shown for the first time that expression of ER46  
342 in human endometrium is distinct from that of full length ER $\alpha$  (ER66). Notably, ER46 is  
343 uniquely expressed on the membrane of uNK cells which are otherwise ER66-negative.  
344 Functional analysis of uNK cells demonstrated that targeting of ER46 with E2-BSA increased  
345 cell motility via rapid, putatively non-genomic mechanisms.

346 Expression of ER46 has not previously been described in human endometrial tissues however  
347 by using antibodies able to distinguish between this variant and full length ER66 we identified  
348 ER46 protein in tissue homogenates from both cycling (non-pregnant) endometrium as well  
349 as first trimester decidua. Previous studies have reported that ER46 acts as a dominant  
350 negative repressor of ER66, inhibiting E2-induced transcription of a reporter gene and cell  
351 proliferation (Li, et al., 2003, Penot, et al., 2005). We suggest expression of ER46 is most  
352 likely to impact on classical responses to ER ligands in the endometrium during the  
353 proliferative phase when ER46 and ER66 were both detected in the nuclei of endometrial cells  
354 (Figure 3). In secretory phase and decidua tissue samples, immunohistochemistry  
355 demonstrated that ER46 was most abundant in the cytoplasm, whereas ER66 was exclusively  
356 nuclear. Thus, fewer positive cells were detected in which both ER46 and ER66 isoforms were  
357 co-localised to cell nuclei. This change in cellular localisation of ER46 indicates ER46/ER66  
358 interactions may differ across the menstrual cycle. Further studies are needed to assess  
359 whether ER46/ER66 dimerisation can impact on the regulation endometrial function in  
360 response to E2. This may be particularly relevant to the pathophysiology of endometrial  
361 hyperplasia/cancer where oestrogens are key drivers of epithelial proliferation and cancer  
362 growth (Collins, et al., 2009, Sanderson, et al., 2017).

363 uNK cells are the predominant leukocyte in secretory endometrium and first trimester decidua  
364 where they mature to acquire phenotypic properties that distinguish them from their peripheral

*Gibson et al. ER46 in human endometrium*

365 blood (pb) NK cell precursors (King, et al., 1991, King, et al., 1989, Pace, et al., 1989). Notably,  
366 uNK cells are transcriptionally distinct from pbNK cells (Koopman, et al., 2003) and they exhibit  
367 decreased cytotoxicity and increased cytokine secretion compared to pbNK cell subsets. This  
368 phenotype is critical to their function and they are essential mediators of vascular remodelling  
369 in early pregnancy (Robson, et al., 2012). Accumulating evidence supports a role for  
370 oestrogens in controlling the function of both pbNK precursors and their uNK cell descendants  
371 within the endometrium. Human pbNK cells are ER-positive with evidence for ER $\alpha$  and ER $\beta$   
372 expression (Pierdominici, et al., 2010). Profiling of human pbNK cells isolated from different  
373 phases of the menstrual cycle demonstrated that pbNK cells exhibit increased adhesion on  
374 day 14 (when E2 concentrations peak in the circulation) compared to other phases of the  
375 cycle. In the same study, E2 treatment in vitro increased adhesion of pbNK cells to uterine  
376 tissues sections (van den Heuvel, et al., 2005). NK cells play a crucial role in defence against  
377 pathogens by carrying out cell-mediated toxicity. This function also appears to be regulated  
378 by oestrogens in women as NK cell activity, measured by lytic effector function, is reported to  
379 be increased in postmenopausal women (low circulating E2) compared to premenopausal  
380 women. Furthermore, NK cell activity is decreased in postmenopausal women following  
381 oestrogen hormone replacement therapy (Albrecht, et al., 1996). This effect is also mirrored  
382 in mouse splenic NK cells where E2 is reported to decrease cytotoxic activity (Curran, et al.,  
383 2001) and their proliferative capacity (Hao, et al., 2008). Thus, bioavailability of E2 appears to  
384 have impacts on homing of pbNK cells to the uterus and also to promote a low cytotoxicity  
385 phenotype that is similar to uNK cells. The oestrogen-dominated microenvironment found in  
386 the endometrium in early pregnancy is therefore likely to contribute to a similar functional  
387 adaptation of uNK cells within the tissue (Gibson, et al., 2013).

388 We previously demonstrated that incubation with E2 increases uNK cell motility (Gibson, et  
389 al., 2015), attributing the impact of E2 to signalling via ER $\beta$ 1 as we failed to detect any ER $\alpha$   
390 (ER66) in these cells. However, the changes in uNK cell motility detected in response to E2  
391 were rapid (within 1 hour in (Gibson, et al., 2015)) which prompted us to consider a role for



*Gibson et al. ER46 in human endometrium*

392 ER46 and membrane-initiated signalling as a mechanism to explain these changes in uNK  
393 cell function. Cells which express ER46 may be more likely to transduce oestrogenic  
394 responses via cell membrane-initiated pathways. For example, in ER-negative COS7 cells, in  
395 which expression of either ER46 or ER66 was induced, ER46 was found to be less efficient at  
396 inducing transcription of an ERE-reporter construct than ER66 but *more* efficient at inducing  
397 membrane-initiated phosphorylation of eNOS (Li, et al., 2003). ER46 has been located to the  
398 cell membrane of peripheral blood leukocytes and is reported to be the only ER isoform  
399 detected in membrane of pbNK cells (Pierdominici, et al., 2010). Stimulation of activated  
400 human pbNK cells with E2-BSA is reported to increase secretion of interferon- $\gamma$  (Pierdominici,  
401 et al., 2010). In the current study we have detected ER46 protein on the cell membrane of  
402 decidual uNK cells and found that incubation with E2-BSA, but not the ER $\beta$ 1-selective agonist  
403 DPN, rapidly increased cell motility consistent with ER46 mediating membrane-initiated rapid  
404 responses to oestrogens. We have previously demonstrated that oestrone (E1) and E2 are  
405 secreted by decidualised stromal cells which may account for accumulation of uNK cells in  
406 perivascular areas of the endometrium (Gibson, et al., 2013) where they promote vascular  
407 remodelling in early pregnancy (Gibson, et al., 2015, Robson, et al., 2012). Changes in uNK  
408 cell motility via ER46 may therefore be required for appropriate control of spatiotemporal  
409 remodelling during the establishment of pregnancy.

410 It is possible that expression of other ERs such as ER36 (36KDa ER isoform) or G protein-  
411 coupled ER (GPER) may mediate membrane-initiated responses to oestrogens in endometrial  
412 cells as both receptors have been detected at the cell membrane (Thomas, et al., 2005, Wang,  
413 et al., 2005, Wang, et al., 2006). However, to the best of our knowledge neither receptor has  
414 been detected in uNK cells. Furthermore, ER36 expression has not been reported in the  
415 endometrium and the receptor protein lacks both transcriptional activation domains (AF-1 and  
416 AF-2) (Wang, et al., 2005) and cannot bind E2 (Lin, et al., 2013). Whilst GPER has been  
417 detected in endometrial tissues its expression appears higher in proliferative than secretory  
418 phase or decidua and it has been localised to epithelial cells (Kolkova, et al., 2010, Plante, et

*Gibson et al. ER46 in human endometrium*

419 al., 2012). This pattern contrasts with the abundant expression of ER46 in multiple cell types  
420 in endometrium and decidua reported in the current study. Although GPER binds E2 it does  
421 not bind other endogenous oestrogens such as E1 or oestriol (E3) (Thomas, et al., 2005) and  
422 drugs that inhibit activation of nuclear ERs, including ICI 182,780, function as full agonists to  
423 GPER (Prossnitz, et al., 2011). Given the results in our previous studies demonstrating that  
424 *both* E1 and E2 increase uNK cell migration and that these effects are abrogated by ICI  
425 182,780 it is unlikely that GPER is responsible for this rapid change in cell function.

426 *Conclusion*

427 In the present study we provide new evidence for expression of human ER46 in the  
428 endometrium and decidua and highlight a role for this isoform in oestrogenic regulation of uNK  
429 cell function. Given the importance of uNK cells to regulating vascular remodelling in early  
430 pregnancy and the potential for selective targeting of ER46, this may be an attractive future  
431 therapeutic target in the treatment of reproductive disorders.

432 **Authors Roles**

433 DAG designed and carried out experimental work and wrote the manuscript. CB-S carried out  
434 experimental work. AE-Z and FC carried out experimental work and wrote the manuscript.  
435 HODC provided clinical samples and revised the manuscript. PTKS designed the work, wrote  
436 and revised the manuscript.

437 Research costs and salaries (DAG, FC, AE-Z, and PTKS) were supported by MRC  
438 Programme Grants G1100356/1 and MR/N024524/1 to PTKS. HODC was supported by MRC  
439 grant G1002033.

440 **Acknowledgements**

441 We thank members of PTKS group for support and technical assistance. We thank Research  
442 Nurses Catherine Murray and Sharon McPherson for patient recruitment and collection of  
443 tissues. We are grateful to Prof Alistair Williams for histological staging of endometrial tissues.

Gibson et al. ER46 in human endometrium

444 References

- 445 Albrecht AE, Hartmann BW, Scholten C, Huber JC, Kalinowska W, Zielinski CC. Effect of estrogen  
446 replacement therapy on natural killer cell activity in postmenopausal women. *Maturitas* 1996;25: 217-  
447 222.
- 448 Binder AK, Winuthayanon W, Hewitt SC, Couse JF, Korach KS. Chapter 25 - Steroid Receptors in the  
449 Uterus and Ovary. In Plant TM and Zeleznik AJ (eds) *Knobil and Neill's Physiology of Reproduction*  
450 *(Fourth Edition)*. 2015. Academic Press, San Diego, pp. 1099-1193.
- 451 Bombail V, MacPherson S, Critchley HO, Saunders PT. Estrogen receptor related beta is expressed in  
452 human endometrium throughout the normal menstrual cycle. *Human reproduction* 2008;23: 2782-  
453 2790.
- 454 Bulmer JN, Innes BA, Levey J, Robson SC, Lash GE. The role of vascular smooth muscle cell apoptosis  
455 and migration during uterine spiral artery remodeling in normal human pregnancy. *FASEB J* 2012;26:  
456 2975-2985.
- 457 Bulmer JN, Lash GE. Uterine natural killer cells: Time for a re-appraisal? *F1000Research* 2019;8.
- 458 Bulmer JN, Morrison L, Longfellow M, Ritson A, Pace D. Granulated lymphocytes in human  
459 endometrium: histochemical and immunohistochemical studies. *Human reproduction* 1991;6: 791-  
460 798.
- 461 Chantalat E, Boudou F, Laurell H, Paliarne G, Houtman R, Melchers D, Rochaix P, Filleron T, Stella A,  
462 Bulet-Schiltz O et al. The AF-1-deficient estrogen receptor ERalpha46 isoform is frequently expressed  
463 in human breast tumors. *Breast cancer research : BCR* 2016;18: 123.
- 464 Collins F, MacPherson S, Brown P, Bombail V, Williams AR, Anderson RA, Jabbour HN, Saunders PT.  
465 Expression of oestrogen receptors, ERalpha, ERbeta, and ERbeta variants, in endometrial cancers and  
466 evidence that prostaglandin F may play a role in regulating expression of ERalpha. *BMC Cancer* 2009;9:  
467 330.
- 468 Critchley HO, Brenner RM, Henderson TA, Williams K, Nayak NR, Slayden OD, Millar MR, Saunders PT.  
469 Estrogen receptor beta, but not estrogen receptor alpha, is present in the vascular endothelium of the  
470 human and nonhuman primate endometrium. *The Journal of clinical endocrinology and metabolism*  
471 2001;86: 1370-1378.
- 472 Critchley HO, Henderson TA, Kelly RW, Scobie GS, Evans LR, Groome NP, Saunders PT. Wild-type  
473 estrogen receptor (ERbeta1) and the splice variant (ERbetacx/beta2) are both expressed within the  
474 human endometrium throughout the normal menstrual cycle. *The Journal of clinical endocrinology*  
475 *and metabolism* 2002;87: 5265-5273.
- 476 Curran EM, Berghaus LJ, Verneti NJ, Saporita AJ, Lubahn DB, Estes DM. Natural killer cells express  
477 estrogen receptor-alpha and estrogen receptor-beta and can respond to estrogen via a non-estrogen  
478 receptor-alpha-mediated pathway. *Cellular immunology* 2001;214: 12-20.
- 479 Flouriot G, Brand H, Seraphin B, Gannon F. Natural trans-spliced mRNAs are generated from the  
480 human estrogen receptor-alpha (hER alpha) gene. *The Journal of biological chemistry* 2002;277:  
481 26244-26251.
- 482 Gaynor LM, Colucci F. Uterine Natural Killer Cells: Functional Distinctions and Influence on Pregnancy  
483 in Humans and Mice. *Frontiers in immunology* 2017;8: 467.
- 484 Gibson DA, Greaves E, Critchley HO, Saunders PT. Estrogen-dependent regulation of human uterine  
485 natural killer cells promotes vascular remodelling via secretion of CCL2. *Human reproduction* 2015;30:  
486 1290-1301.
- 487 Gibson DA, McInnes KJ, Critchley HO, Saunders PT. Endometrial Intracrinology--generation of an  
488 estrogen-dominated microenvironment in the secretory phase of women. *The Journal of clinical*  
489 *endocrinology and metabolism* 2013;98: E1802-1806.
- 490 Gibson DA, Saunders PT. Estrogen dependent signaling in reproductive tissues - a role for estrogen  
491 receptors and estrogen related receptors. *Mol Cell Endocrinol* 2012;348: 361-372.
- 492 Gibson DA, Simitsidellis I, Collins F, Saunders PTK. Endometrial Intracrinology: Oestrogens, Androgens  
493 and Endometrial Disorders. *International journal of molecular sciences* 2018;19.

Gibson et al. ER46 in human endometrium

- 494 Hao S, Li P, Zhao J, Hu Y, Hou Y. 17beta-estradiol suppresses cytotoxicity and proliferative capacity of  
495 murine splenic NK1.1+ cells. *Cell Mol Immunol* 2008;5: 357-364.
- 496 Henderson TA, Saunders PT, Moffett-King A, Groome NP, Critchley HO. Steroid receptor expression in  
497 uterine natural killer cells. *The Journal of clinical endocrinology and metabolism* 2003;88: 440-449.
- 498 Kim KH, Toomre D, Bender JR. Splice isoform estrogen receptors as integral transmembrane proteins.  
499 *Molecular biology of the cell* 2011;22: 4415-4423.
- 500 Kim KH, Young BD, Bender JR. Endothelial estrogen receptor isoforms and cardiovascular disease. *Mol*  
501 *Cell Endocrinol* 2014;389: 65-70.
- 502 King A, Balendran N, Wooding P, Carter NP, Loke YW. CD3- leukocytes present in the human uterus  
503 during early placentation: phenotypic and morphologic characterization of the CD56++ population.  
504 *Developmental immunology* 1991;1: 169-190.
- 505 King A, Wellings V, Gardner L, Loke YW. Immunocytochemical characterization of the unusual large  
506 granular lymphocytes in human endometrium throughout the menstrual cycle. *Human immunology*  
507 1989;24: 195-205.
- 508 Kolkova Z, Noskova V, Ehinger A, Hansson S, Casslen B. G protein-coupled estrogen receptor 1 (GPER,  
509 GPR 30) in normal human endometrium and early pregnancy decidua. *Molecular human reproduction*  
510 2010;16: 743-751.
- 511 Koopman LA, Kopcow HD, Rybalov B, Boyson JE, Orange JS, Schatz F, Masch R, Lockwood CJ, Schachter  
512 AD, Park PJ et al. Human decidual natural killer cells are a unique NK cell subset with  
513 immunomodulatory potential. *J Exp Med* 2003;198: 1201-1212.
- 514 Li L, Haynes MP, Bender JR. Plasma membrane localization and function of the estrogen receptor alpha  
515 variant (ER46) in human endothelial cells. *Proceedings of the National Academy of Sciences of the*  
516 *United States of America* 2003;100: 4807-4812.
- 517 Lin AH, Li RW, Ho EY, Leung GP, Leung SW, Vanhoutte PM, Man RY. Differential ligand binding affinities  
518 of human estrogen receptor-alpha isoforms. *PloS one* 2013;8: e63199.
- 519 Milne SA, Henderson TA, Kelly RW, Saunders PT, Baird DT, Critchley HO. Leukocyte populations and  
520 steroid receptor expression in human first-trimester decidua; regulation by antiprogesterin and  
521 prostaglandin E analog. *The Journal of clinical endocrinology and metabolism* 2005;90: 4315-4321.
- 522 Pace D, Morrison L, Bulmer JN. Proliferative activity in endometrial stromal granulocytes throughout  
523 menstrual cycle and early pregnancy. *Journal of clinical pathology* 1989;42: 35-39.
- 524 Penot G, Le Peron C, Merot Y, Grimaud-Fanouillere E, Ferriere F, Boujrad N, Kah O, Saligaut C, Ducouret  
525 B, Metivier R et al. The human estrogen receptor-alpha isoform hERalpha46 antagonizes the  
526 proliferative influence of hERalpha66 in MCF7 breast cancer cells. *Endocrinology* 2005;146: 5474-  
527 5484.
- 528 Pierdominici M, Maselli A, Colasanti T, Giammarioli AM, Delunardo F, Vacirca D, Sanchez M,  
529 Giovannetti A, Malorni W, Ortona E. Estrogen receptor profiles in human peripheral blood  
530 lymphocytes. *Immunology letters* 2010;132: 79-85.
- 531 Plante BJ, Lessey BA, Taylor RN, Wang W, Bagchi MK, Yuan L, Scotchie J, Fritz MA, Young SL. G protein-  
532 coupled estrogen receptor (GPER) expression in normal and abnormal endometrium. *Reproductive*  
533 *sciences* 2012;19: 684-693.
- 534 Prossnitz ER, Barton M. The G-protein-coupled estrogen receptor GPER in health and disease. *Nature*  
535 *reviews Endocrinology* 2011;7: 715-726.
- 536 Robson A, Harris LK, Innes BA, Lash GE, Aljunaidy MM, Aplin JD, Baker PN, Robson SC, Bulmer JN.  
537 Uterine natural killer cells initiate spiral artery remodeling in human pregnancy. *FASEB J* 2012;26:  
538 4876-4885.
- 539 Sanderson PA, Critchley HO, Williams AR, Arends MJ, Saunders PT. New concepts for an old problem:  
540 the diagnosis of endometrial hyperplasia. *Human reproduction update* 2017;23: 232-254.
- 541 Thomas P, Pang Y, Filardo EJ, Dong J. Identity of an estrogen membrane receptor coupled to a G  
542 protein in human breast cancer cells. *Endocrinology* 2005;146: 624-632.

*Gibson et al. ER46 in human endometrium*

543 van den Heuvel MJ, Horrocks J, Bashar S, Taylor S, Burke S, Hatta K, Lewis JE, Croy BA. Menstrual cycle  
544 hormones induce changes in functional interactions between lymphocytes and decidual vascular  
545 endothelial cells. *The Journal of clinical endocrinology and metabolism* 2005;90: 2835-2842.  
546 Wang Z, Zhang X, Shen P, Loggie BW, Chang Y, Deuel TF. Identification, cloning, and expression of  
547 human estrogen receptor-alpha36, a novel variant of human estrogen receptor-alpha66. *Biochemical  
548 and biophysical research communications* 2005;336: 1023-1027.  
549 Wang Z, Zhang X, Shen P, Loggie BW, Chang Y, Deuel TF. A variant of estrogen receptor-{alpha}, hER-  
550 {alpha}36: transduction of estrogen- and antiestrogen-dependent membrane-initiated mitogenic  
551 signaling. *Proceedings of the National Academy of Sciences of the United States of America* 2006;103:  
552 9063-9068.

553

554

555 **Figures**

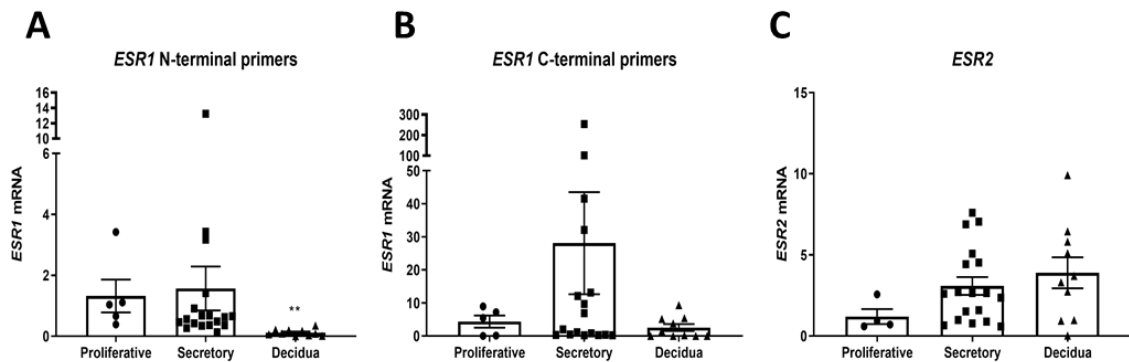

556

557 **Figure 1. Expression of ER isoforms in endometrial tissues**

558 The expression of *ESR1*, using N- and C-terminal primers, and *ESR2* was assessed using  
559 qPCR in proliferative and secretory phase endometrium as well as first trimester decidua  
560 tissue samples. **A** N-terminal primers detected mRNAs encoding *ESR1* in all endometrial  
561 tissues, expression was unchanged between proliferative and secretory endometrial tissues  
562 and significantly decreased in decidua. **B** C-terminal primers detected mRNAs encoding *ESR1*  
563 in all endometrial tissues, expression was unchanged between endometrial tissues but mean  
564 expression of *ESR1* was greatest in secretory phase endometrial samples. **C** *ESR2* was  
565 detected in all endometrial tissues. Tissues for qPCR analysis; proliferative,  $n = 4-5$ ; secretory  
566  $n = 18$ ; decidua,  $n = 10$ . Kruskal–Wallis test with multiple comparisons. \*\* $P < 0.01$ . All data  
567 are presented as mean  $\pm$  s.e.m.

568

569

Gibson et al. ER46 in human endometrium

570

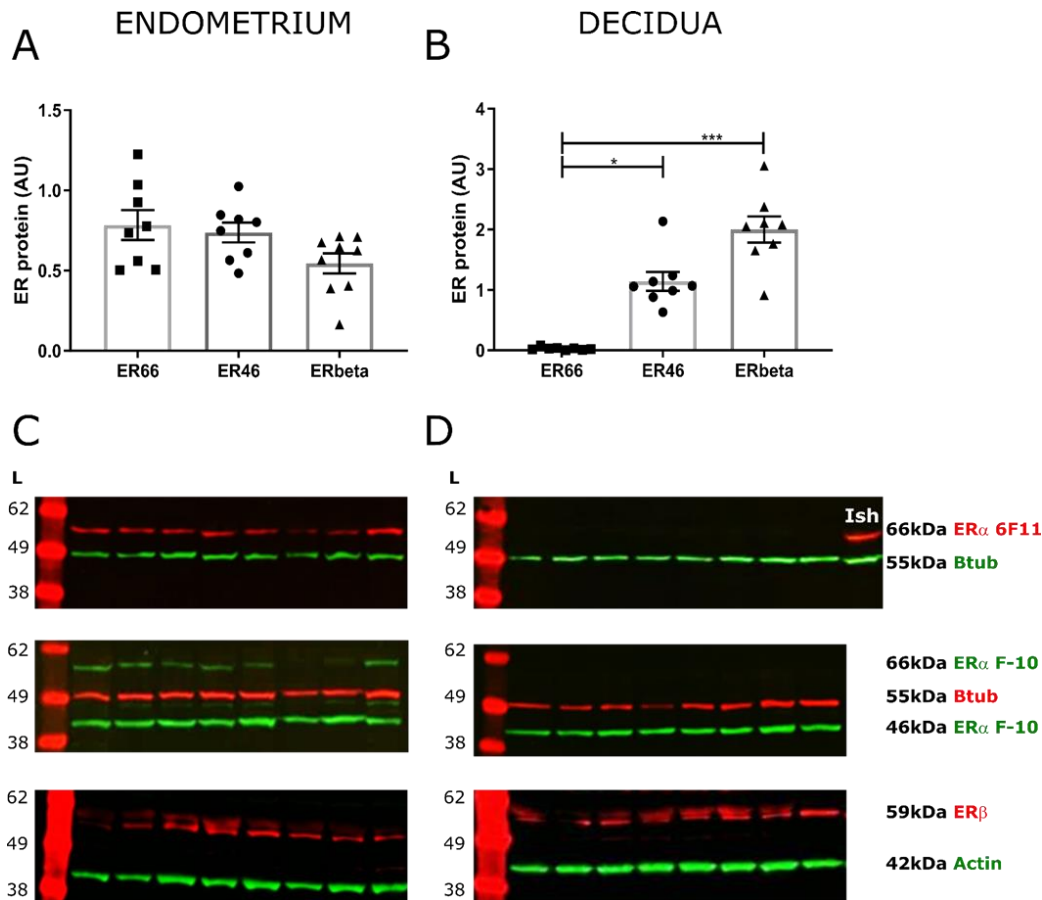

571

572 **Figure 2. Protein expression of ER isoforms in endometrial tissues**

573 Protein expression of ER isoforms in endometrial tissue homogenates (proliferative phase  
574 n=4, secretory phase n=4, decidua n=8) was assessed by western blot using the ER $\alpha$  6F11  
575 or the C-terminal-specific ER $\alpha$  F-10 antibodies and an antibody that detected ER $\beta$ . **A** Protein  
576 expression of ER isoforms ER66 (6F11 antibody band), ER46 (F-10 antibody band) and ER $\beta$   
577 was assessed by densitometry analysis in endometrium (**A**) and decidua (**B**) and normalised  
578 to loading control. All isoforms were present in endometrial tissues (pooled proliferative and  
579 secretory) but ER46 ( $p < 0.05$ ) and ER $\beta$  ( $p < 0.001$ ) protein concentrations were significantly  
580 greater than ER66 in decidua tissues. **C** In non-pregnant endometrial tissues, full length ER $\alpha$   
581 was detected at a band corresponding to 66kDa (red) with the ER $\alpha$  6F11 antibody. The C-  
582 terminal ER $\alpha$  F-10 antibody detected two bands in non-pregnant endometrial tissue  
583 homogenates corresponding to 66kDa and 46kDa (green). ER $\beta$  was detected at a band  
584 corresponding to 59 kDa (red). **D** In first trimester decidua tissue homogenates, full length  
585 ER $\alpha$  was not detected with the ER $\alpha$  6F11 antibody but was present in Ishikawa cell control  
586 homogenate (Ish) at a band corresponding to 66kDa (red). Only the 46kDa band was detected  
587 in decidua tissue homogenates using the ER $\alpha$  F-10 antibody (green). ER $\beta$  was detected at a  
588 band corresponding to 59 kDa (red). ER antibodies, band sizes and loading controls (actin or  
589 B-tubulin (Btub)) as indicated. AU - arbitrary units.  $*P < 0.05$ .  $***P < 0.001$ . Kruskal–Wallis  
590 test with multiple comparisons. Data are presented as mean  $\pm$  s.e.m.

591

Gibson et al. ER46 in human endometrium

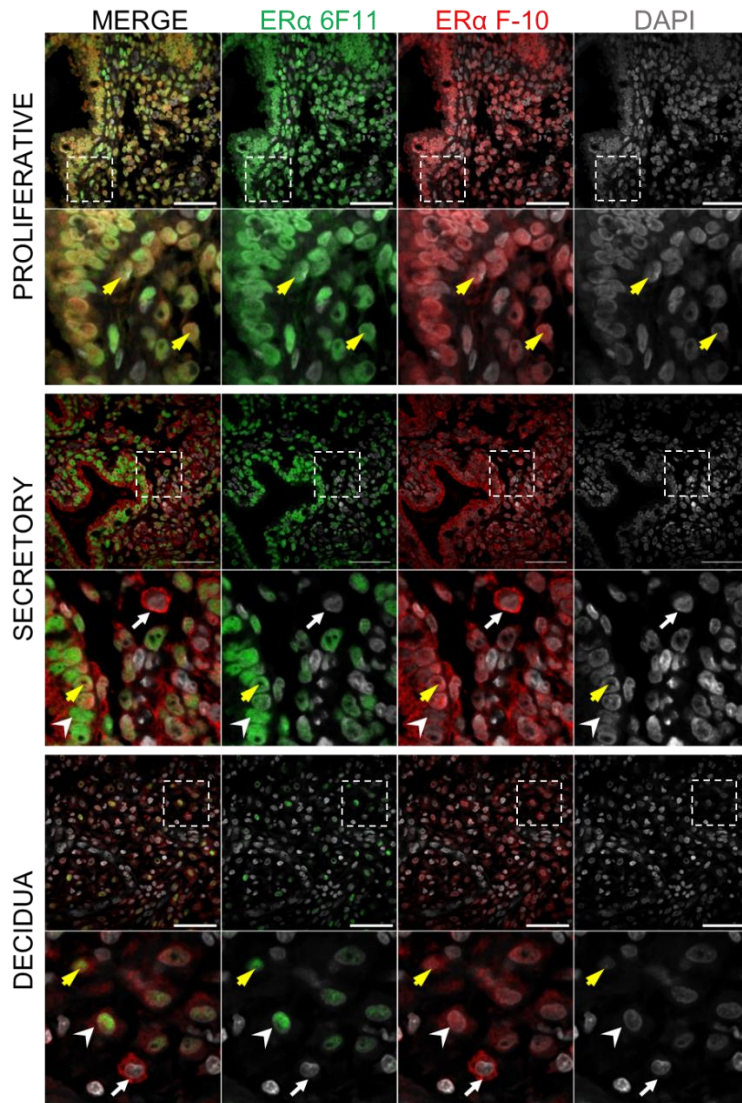

592

593 **Figure 3. Immunostaining of ER isoforms in endometrial tissues.**

594 The expression and localisation of ER proteins in endometrial tissues was assessed using  
595 multiplex immunohistochemistry. The ER $\alpha$  6F11 (green) or the C-terminal-specific ER $\alpha$  F-10  
596 antibodies (red) identified either ER66 or both ER66 and ER46 respectively. In proliferative  
597 phase endometrial biopsies, the expression of both antibodies co-localised and was detected  
598 in the nuclei of all cells (inset; yellow arrows). In secretory phase endometrial biopsies, strong  
599 nuclear staining for ER66 was detected using the ER $\alpha$  6F11 antibody in both stromal and  
600 epithelial cells (arrowhead; green) and co-localisation of both antibodies was detected in the  
601 nuclei of some stromal cells (yellow arrow). Extra-nuclear expression of ER $\alpha$  (putatively ER46)  
602 was detected in the cytoplasm of epithelial and stromal cells (red) and was localised to the  
603 membrane of some cells within the stromal compartment which did not express ER66 (putative  
604 immune cells; white arrow). In decidua tissues, extra-nuclear expression of ER $\alpha$  (F-10 ER $\alpha$   
605 antibody; putatively ER46) was detected in the cytoplasm of stromal cells (red; arrowhead)  
606 and was localised to the membrane of putative immune cells which did not express ER66  
607 (white arrow). Some nuclear expression of ER66 was detected using by the ER $\alpha$  6F11  
608 antibody in stromal cells (green) and co-expression of both antibodies was detected in the  
609 nuclei of stromal cells (yellow arrow). Dashed box indicates cropped zoom region. Images are  
610 representative of at least 3 different patient samples per tissue type. Scale bars 20  $\mu$ m, nuclear  
611 counterstain DAPI (grey).

612



Gibson et al. ER46 in human endometrium

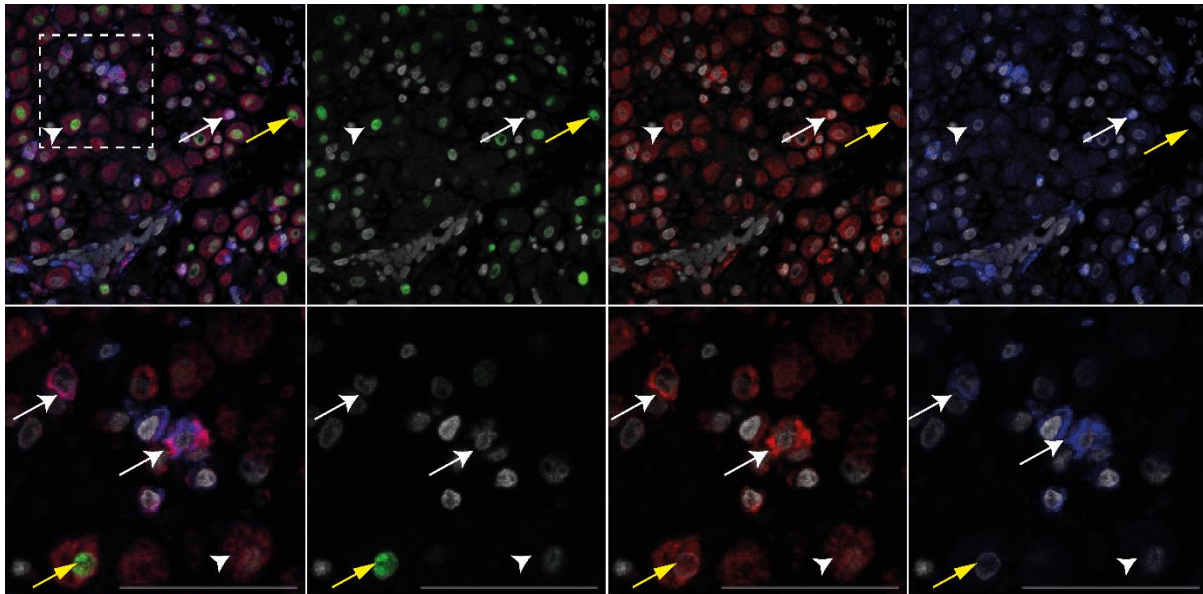

613 ERα 6F11 ERα F-10 CD56 DAPI

614 **Figure 4. Expression of ER46 in decidual uNK cells**

615 The expression and localisation of ER proteins in uNK cells was assessed in decidua tissues  
616 using multiplex immunohistochemistry. The ERα 6F11 (green) or the C-terminal-specific ERα  
617 F-10 antibodies (red) and the uNK cell marker CD56 (blue) were assessed. UNK cells  
618 abundant in decidua and staining for surface marker CD56 (blue) co-localised with membrane  
619 staining for ERα (red) identified using the ERα F-10 antibody (ER46; white arrows) but were  
620 negative for ER66. ERα identified using the ERα F-10 antibody was also detected in the  
621 cytoplasm of stromal cells and weakly in stromal nuclei (red, white arrowhead). Some nuclear  
622 staining for ER66 was detected using the ERα 6F11 antibody in stromal cells (green) which  
623 co-expressed ER46 detected with ERα F-10 antibody staining (yellow arrow). Images are  
624 representative of staining from at least 3 different patient samples. Dashed box indicates  
625 cropped zoom region. Scale bars 50 µm, nuclear counterstain DAPI (grey).

626

Gibson et al. ER46 in human endometrium

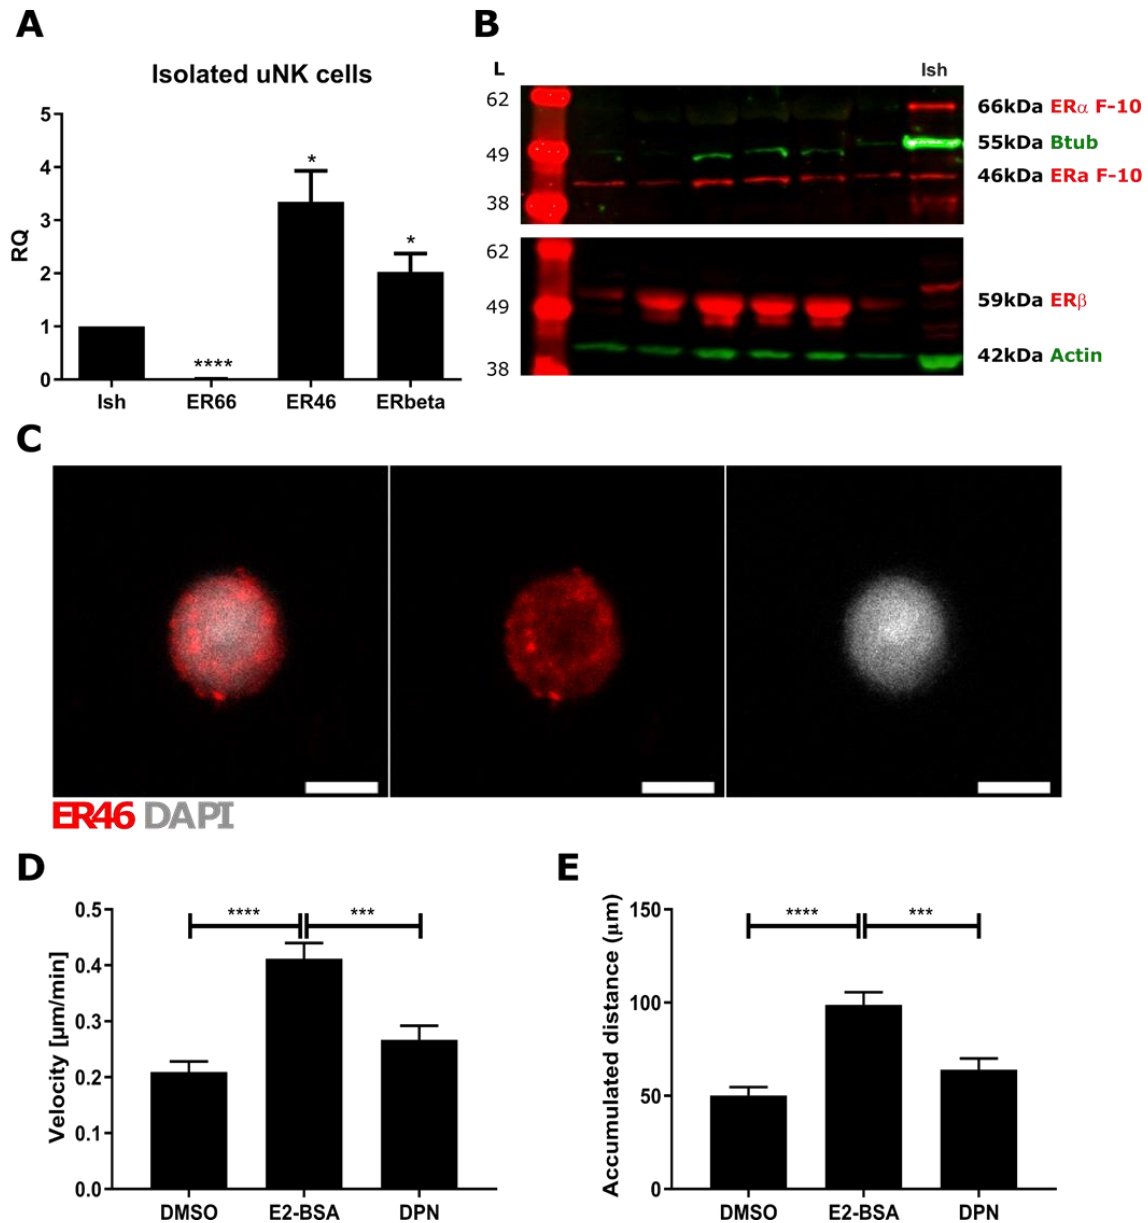

627

628

629

**Figure 5. Isolated uNK cells express ER46 and increase cell motility in response to E2-BSA.**

630

631

632

633

634

635

636

637

638

639

640

641

642

643

644

UNK cells were isolated from decidua tissues by magnetic cell sorting using the MACS system. The expression of ER isoforms was assessed by qPCR, western blot and immunofluorescence. **A** Primers that mapped to either the N- or C-terminal of *ESR1*, or *ESR2* were used to assess mRNA expression in uNK cells relative to Ishikawa cell control lysates. The expression of mRNAs encoding the N-terminal of *ESR1* were significantly reduced in uNK cells compared to Ishikawa control ( $p < 0.0001$ ). In contrast, the expression of mRNAs encoding the C-terminal of *ESR1* and *ESR2* were significantly increased in uNK cells compared to Ishikawa control ( $p < 0.01$ ). **B** Protein expression was assessed by western blot in cell lysates of isolated uNK cells. ER $\alpha$  protein was assessed using the F-10 ER $\alpha$  antibody and a 46kDa band was detected in uNK cells. No corresponding 66kDa band was detected in uNK cells but was present in Ishikawa control lysate (Ish). ER $\beta$  was detected in both uNK cells and Ishikawa control by western blot. **C** Direct immunofluorescence was performed on isolated uNK cells using the F-10 ER $\alpha$  antibody and expression of ER46 was confirmed. Live cell imaging of isolated uNK cells was performed to assess cell motility in response to either vehicle control (DMSO), a membrane impermeable form of E2 (E2-BSA) or the ER $\beta$  selective

*Gibson et al. ER46 in human endometrium*

645 agonist DPN. **D** E2-BSA significantly increased uNK cell velocity compared to vehicle control  
646 (DMSO;  $p < 0.0001$ ) and DPN ( $p < 0.001$ ). **E** E2-BSA significantly increased the accumulated  
647 distance of uNK cells compared to vehicle control (DMSO;  $p < 0.0001$ ) and DPN ( $p < 0.001$ ).  
648 DPN did not have an independent impact on either velocity or accumulated distance of uNK  
649 cells. ER antibodies and band sizes as indicated, loading controls B-actin or B-tubulin as  
650 indicated. Scale bars 5  $\mu\text{m}$ , nuclear counterstain DAPI (grey). \* $P < 0.05$ , \*\*\* $P < 0.001$ , \*\*\*\* $P$   
651  $< 0.0001$ . Samples and analysis - qPCR: uNK cells,  $n = 5$ ; Ishikawa  $n = 7$ ; One-sample  $t$  test  
652 with hypothetical mean of 1. Western blot: uNK cells,  $n = 6$ . Cell motility analysis:  $n = 76$  per  
653 treatment, Kruskal–Wallis test with multiple comparisons. All data are presented as mean  $\pm$   
654 s.e.m.
